# Supplementary material
Source: PubMed Central journal article supplement (PMC6052275)
Supplement: AEM.00397-18_zam015188640s1.pdf [file AEM.00397-18_zam015188640s1.pdf]

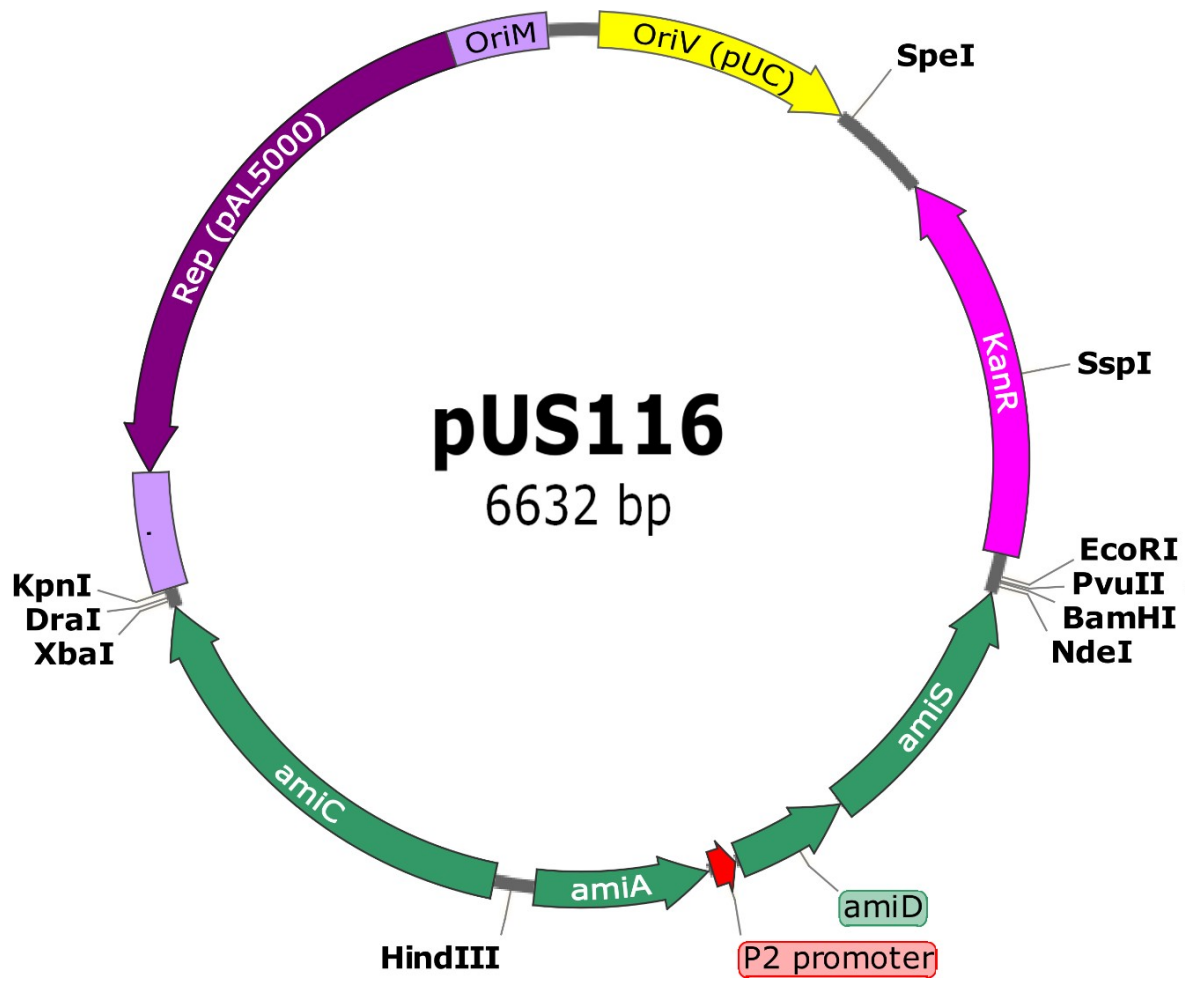

**Supplemental Figure 1.** Structure of plasmid pUS116. Diagram made with SnapGene software.

n\_etnH : **ATGAACGCACGCGATCTCGCAGGC****CGA**AGCTGGGGTGTAACACGGGCGATGCTGCAACTGTCT**CGA**TCCGTTTTG : 75  
s\_etnH : **ATGAACGCACGCGATCTCGCAGGC****CGT**AGCTGGGGTGTAACACGGGCGATGCTGCAACTGTCT**CGT**TCCGTTTTG : 75  
n\_etnH : CTCTCACTTAGTGACGGCTTAATCGTCTGGCGAATATTGGCCTG**TCC**GGACACAACGCCAAGCCGGAAGCTGTCA : 150  
s\_etnH : CTCTCACTTAGTGACGGCTTAATCGTCTGGCGAATATTGGCCTG**TCT**GGACACAACGCCAAGCCGGAAGCTGTCA : 150  
n\_etnH : CGCGAGGACGATGTGCAACCA**AGG**AGTATCGACGAATATCAGTGCGGGTCTTCCTCATCGATCCTGGACAATGCG : 225  
s\_etnH : CGCGAGGACGATGTGCAACCA**CGG**AGTATCGACGAATATCAGTGCGGGTCTTCCTCATCGATCCTGGACAATGCG : 225  
n\_etnH : ACG**TCC**GAACA**AGA**ACCGAAGATCTG**CCC**GTCAAAGGAAGTGGGCGCCCGAGCAGTCTGCTCTCG**CCC**TGGGTC : 300  
s\_etnH : ACG**TCC**GAACA**CGT**ACCGAAGATCTG**CCG**GTCAAAGGAAGTGGGCGCCCGAGCAGTCTGCTGTCTCG**CCG**TGGGTC : 300  
n\_etnH : AATGAAGAAGGAGCCGTT**CTA**AATGGCTGTT**AG**  
s\_etnH : AATGAAGAAGGAGCCGTT**CTA**AATGGCTGTT**TAA**

n\_etnA : **ATGGCTGTTAGTCACATTCCACCGCAGCGGAAGGCGCTGTCCGAAACCGGACATTCCGGCTGGGTGACGCCAAAAGGCAAGCGT** : 84  
s\_etnA : **ATGGCTGTTAGTCACATTCCACCGCAGCGGAAGGCGCTGTCCGAAACCGGACATTCCGGCTGGGTGACGCCAAAAGGCAAGCGT** : 84  
n\_etnA : **CCC**ACCGAGTACGAAGATCTGACCGTAGGGCAGCAGTCGACCCCGGCGCAGTTCGCATTT**CGA**AGGCTGGCCGCT**CGA**TTTCGAC : 168  
s\_etnA : **CCG**ACCGAGTACGAAGATCTGACCGTAGGGCAGCAGTCGACCCCGGCGCAGTTCGCATTT**CGT**AGGCTGGCCGCT**CGT**TTTCGAC : 168  
n\_etnA : AACGGACGCGAC**CCCT**TACACCGAAGACTCGACGGTACTGCGCTCGTCTAACTGGTACGCGTATCGCGATCCGAACCAGACGATG : 252  
s\_etnA : AACGGACGCGAC**CCGT**TACACCGAAGACTCGACGGTACTGCGCTCGTCTAACTGGTACGCGTATCGCGATCCGAACCAGACGATG : 252  
n\_etnA : AACCGTCCGTACATCGCTGGCGTACACGAAGCTGAAAAAGCCCTCCAGAACACGTTCCCTCGGTGCGAGTGCGGGCGGCCTGTTC : 336  
s\_etnA : AACCGTCCGTACATCGCTGGCGTACACGAAGCTGAAAAAGCCCTCCAGAACACGTTCCCTCGGTGCGAGTGCGGGCGGCCTGTTC : 336  
n\_etnA : GGCTTCGCGAACCCTGAATGGGTGAGCAAGGCGCTCGCCAAGCACTACATGACGTAC**CCC**TTTCGTGAGTACGGCATGTTTCTT : 420  
s\_etnA : GGCTTCGCGAACCCTGAATGGGTGAGCAAGGCGCTCGCCAAGCACTACATGACGTAC**CCG**TTTCGTGAGTACGGCATGTTTCTT : 420  
n\_etnA : GCGCTGTGTTACGCAGAGCGCGAGGCACTTTCCGACACGGTGACGTTCTCTATCGTGTTTCGAGGCCGCGACAAACTGCGGCAC : 504  
s\_etnA : GCGCTGTGTTACGCAGAGCGCGAGGCACTTTCCGACACGGTGACGTTCTCTATCGTGTTTCGAGGCCGCGACAAACTGCGGCAC : 504  
n\_etnA : CTGCAAGATGTCGTCTACTACTCCTTCGAACCTGCCGAGGCGCACTCCGAATTCAGTGACGAGGAGTGCTTGCGGGTCTGGAAA : 588  
s\_etnA : CTGCAAGATGTCGTCTACTACTCCTTCGAACCTGCCGAGGCGCACTCCGAATTCAGTGACGAGGAGTGCTTGCGGGTCTGGAAA : 588  
n\_etnA : GAAGACCCGGTTTTGGCAGGGTGCTCGTGAGGCGATCGAGAACGTCATTGCGCTCGATGACTGGATGGAGATCGTCGTTGCCCTG : 672  
s\_etnA : GAAGACCCGGTTTTGGCAGGGTGCTCGTGAGGCGATCGAGAACGTCATTGCGCTCGATGACTGGATGGAGATCGTCGTTGCCCTG : 672  
n\_etnA : AACCTCTGCTTCGATCCGCTGTTCCGGTGAATTGGCGAAAGTCGAATACTTACC**CGA**TTTTCGCGGCGCGAACGGCGACCTGGTT : 756  
s\_etnA : AACCTCTGCTTCGATCCGCTGTTCCGGTGAATTGGCGAAAGTCGAATACTTACC**CGT**TTTTCGCGGCGCGAACGGCGACCTGGTT : 756  
n\_etnA : ACACCGTCGGTCATCGCCTCATCCGAG**GCC**GACACAGTGCAGCCCGGGCGTGGACAAAGGAACCTCATCCGCCATTGGGTGGG : 840  
s\_etnA : ACACCGTCGGTCATCGCCTCATCCGAG**GCG**GACACAGTGCAGCCCGGGCGTGGACAAAGGAACCTCATCCGCCATTGGGTGGG : 840  
n\_etnA : GAATCC**CGA**GTATGGCACCCACAACCTCGTCGATCATTGCAGCGTGGGTGGACAAGTGGAAACAGGTAATCGCTGAAAGCCTG**CGA** : 924  
s\_etnA : GAATCC**CGT**GTATGGCACCCACAACCTCGTCGATCATTGCAGCGTGGGTGGACAAGTGGAAACAGGTAATCGCTGAAAGCCTG**CGT** : 924  
n\_etnA : CGCCTTCGC**CCC**CGTGTTCCT**CGA**GGTTCC**TAA** : 957  
s\_etnA : CGCCTTCGC**CCG**CGTGTTCCT**CGT**GGTTCC**TAA** : 957

n\_etnB : **TTG**TCATCTGCCACG**CCC**GCTCGGGAT**AGA**ACGCAAGTCCGCGACACCGTCGGCATCTCGCTGATCGGGAGTTCA : 75  
s\_etnB : **ATG**TCATCTGCCACG**CCG**GCTCGGGAT**CGT**ACGCAAGTCCGCGACACCGTCGGCATCTCACTGATCGGGAGTTCA : 75  
n\_etnB : GAAACCAATGTCATCGTCGACATGGTTGCTGAGCTTCTC**CCC**GACGCCAAGATCACCGACAACGACGTGTTCTTC : 150  
s\_etnB : GAAACCAATGTCATCGTCGACATGGTTGCTGAGCTTCTC**CCG**GACGCCAAGATCACCGACAACGACGTGTTCTTC : 150  
n\_etnB : AAG**ATA**GAACGCGACGAAATGCTGAGCTTCGACATGGTTGAACTTAGCGAC**CGA**CTTGGCAAGCCGTATACGGTT : 225  
s\_etnB : AAG**ATT**GAACGCGACGAAATGCTGAGCTTCGACATGGTTGAACTTAGCGAC**CGT**CTTGGCAAGCCGTATACGGTT : 225  
n\_etnB : CATGACTTCCTCGTCAACATGACCAGTTACTACGGG**CGA**ATTGTCTGTAAGGATCACGAGATCGAGATCCACTCG : 300  
s\_etnB : CATGACTTCCTCGTCAACATGACCAGTTACTACGGG**CGT**ATTGTCTGTAAGGATCACGAGATCGAGATCCACTCG : 300  
n\_etnB : GAGATCCTCCCGGAA**CGA**TTCCGCGACTAA : 330  
s\_etnB : GAGATCCTCCCGGAA**CGT**TTCCGCGACTAA : 330

n\_etnC : **ATG**GCTAAT**CCC**ACTATCGAAGTTGTTACGAAAAATCCAAG**AGG**TACGACTGGGGCTTCGATTAT**GCG**CG**CCC**GACCCGAAG : 84  
s\_etnC : **ATG**GCTAAT**CCG**ACTATCGAAGTTGTTACGAAAAATCCAAG**CGT**TACGACTGGGGCTTCGATTAT**GCC**CG**CCG**GACCCGAAG : 84  
n\_etnC : TTTCCGACCCGCTACATCATC**CCC**CGAAGGGCAAGGATCCATTCCGGTCGATGCTGCGCGGTTACGCAGCGATGGAGACGGAA : 168  
s\_etnC : TTTCCGACCCGCTACATCATC**CCG**CGAAGGGCAAGGATCCATTCCGGTCGATGCTGCGCGGTTACGCAGCGATGGAGACGGAA : 168  
n\_etnC : AAGGACAACCGGGTCTACGGCGGTCTGGACAGCAACGTTTCGTTACCGCAACGCAACGTCGGCCGAGCCGCGCTTCATTGAAGGG : 252  
s\_etnC : AAGGACAACCGGGTCTACGGCGGTCTGGACAGCAACGTTTCGTTACCGCAACGCAACGTCGGCCGAGCCGCGCTTCATTGAAGGG : 252  
n\_etnC : ATGAAGTTCGGAATTCCAAGCTTCACCGACGCGGAGTACCAGGCAGTCTGCGGGTCAGGCTTTCTGATCGCATCCATGAAGAAC : 336  
s\_etnC : ATGAAGTTCGGAATTCCAAGCTTCACCGACGCGGAGTACCAGGCAGTCTGCGGGTCAGGCTTTCTGATCGCATCCATGAAGAAC : 336  
n\_etnC : CAGGAACTGCGCCAGGGCTACGCCGGCCAGATGCTCGACGAGGTTTCGTACACGCGAGATCGAAGTCGCCCTGCGGAAGTACTAC : 420  
s\_etnC : CAGGAACTGCGCCAGGGCTACGCCGGCCAGATGCTCGACGAGGTTTCGTACACGCGAGATCGAAGTCGCCCTGCGGAAGTACTAC : 420  
n\_etnC : CTGAAGAACTACCACGACCCGGCTGGCTTTGACATCGGCCAGATCGGTCTGGGTAATCACCCGATCGGCACCCTGGCACGGGCT : 504  
s\_etnC : CTGAAGAACTACCACGACCCGGCTGGCTTTGACATCGGCCAGATCGGTCTGGGTAATCACCCGATCGGCACCCTGGCACGGGCT : 504  
n\_etnC : TCATTCCAGTCGTTCAACACCGGTGAT**CCCG**TGGAGGTTTCGATGTGTCTGAACATCGTCCTCGAGACTGCCTACACGAAC**CCC** : 588  
s\_etnC : TCATTCCAGTCGTTCAACACCGGTGAT**CCG**TGGAGGTTTCGATGTGTCTGAACATCGTCCTCGAGACTGCCTACACGAAC**CCG** : 588  
n\_etnC : CTCGTGGTGGCCCTGCCCTCAGGTGCTGCCGTCAACGGAGAGCACGCGATGCCACTGCGTTCCTCTCGATCCAGTCTGACGAG : 672  
s\_etnC : CTCGTGGTGGCCCTGCCCTCAGGTGCTGCCGTCAACGGAGAGCACGCGATGCCACTGCGTTCCTCTCGATCCAGTCTGACGAG : 672  
n\_etnC : TCGCGGCACATGGCCAACGGCTATGGGACCTTGATGAGCGTTATTTCAGGAGCATGACAACCTGCCGTTCTGCAGGAATCGCTC : 756  
s\_etnC : TCGCGGCACATGGCCAACGGCTATGGGACCTTGATGAGCGTTATTTCAGGAGCATGACAACCTGCCGTTCTGCAGGAATCGCTC : 756  
n\_etnC : GACCGTCACTTCTGGCACCAGCATCAGTTCGATGGACACTCTGGTCGGCGTTCCTTTCCGAGTACTTCGCCGTGGAACGCCCTTGG : 840  
s\_etnC : GACCGTCACTTCTGGCACCAGCATCAGTTCGATGGACACTCTGGTCGGCGTTCCTTTCCGAGTACTTCGCCGTGGAACGCCCTTGG : 840  
n\_etnC : GCTTACAAAGATGTCTGGGAAGAGTGGTTCGTCGACGACTTCGTCGGCTCCTACATGAGCCGGCTCAGCCCCTCGGTCTCAAG : 924  
s\_etnC : GCTTACAAAGATGTCTGGGAAGAGTGGTTCGTCGACGACTTCGTCGGCTCCTACATGAGCCGGCTCAGCCCCTCGGTCTCAAG : 924  
n\_etnC : CCGCCGGCG**AGG**CTTGGTGACGTCGCCGCTATGTCAACGACATGCACCATTTCAGTGGCGATCGCGCTTGGCGCTATGTGGCCG : 1008  
s\_etnC : CCGCCGGCG**CGT**CTTGGTGACGTCGCCGCTATGTCAACGACATGCACCATTTCAGTGGCGATCGCGCTTGGCGCTATGTGGCCG : 1008  
n\_etnC : CTGAACTTCTGGCGGACCGACCCTATGGGTCCGGCAGACTACGAATGGTTTGAGAACCCTACCCGGGCTGGACCAAGTCCTAC : 1092  
s\_etnC : CTGAACTTCTGGCGGACCGACCCTATGGGTCCGGCAGACTACGAATGGTTTGAGAACCCTACCCGGGCTGGACCAAGTCCTAC : 1092  
n\_etnC : GGCGGTCTGTGGGACGCATTCCGCGATATGAGCGACCCGTCGTGGCG**CGA**ATCTTGTTCAGGAGTTGCCGTCACTGCCGCCG : 1176  
s\_etnC : GGCGGTCTGTGGGACGCATTCCGCGATATGAGCGACCCGTCGTGGCG**CGT**ATCTTGTTCAGGAGTTGCCGTCACTGCCGCCG : 1176  
n\_etnC : TTCTGCCAGGTCTGCCATGTTCCGTGCGTTATGCCGACATTGCACGCCCCGGAAACTCGCATCGTGTACGGCGAAGGCAAGAAG : 1260  
s\_etnC : TTCTGCCAGGTCTGCCATGTTCCGTGCGTTATGCCGACATTGCACGCCCCGGAAACTCGCATCGTGTACGGCGAAGGCAAGAAG : 1260

```

n_etnD : ATGGGTGACACAGTAACCGTACAGCCGTTCCGTGACACGTTCCCTGTGCGAATCAGGAGAGACGGTACTGTCCGCAATTCTCCGA : 84
s_etnD : ATGGGTGACACAGTAACCGTACAGCCGTTCCGTGACACGTTCCCTGTGCGAATCAGGAGAGACGGTACTGTCCGCAATTCTCCGT : 84
n_etnD : AATGGCAGATTCGTA AAAATACGGCTGCAAGCACGGCGGATGCAGCACCTGCCGAGCTCAGGTCGTGCGAAGGCGAATTCACCCAA : 168
s_etnD : AATGGCCGTTTCGTA AAAATACGGCTGCAAGCACGGCGGATGCAGCACCTGCCGTGCTCAGGTCGTGCGAAGGCGAATTCACCCAA : 168
n_etnD : TCCGACGGAACGTCGTTTTCCCTGAGCGACGCTGACCGCGACGCAGGTGTCGTGCTGCTCTGCTCGACATATGCAGACGGCGAC : 252
s_etnD : TCCGACGGAACGTCGTTTTCCCTGAGCGACGCTGACCGCGACGCAGGTGTCGTGCTGCTCTGCTCGACATATGCAGACGGCGAC : 252
n_etnD : TTGGTCGTCGACGTCGGCGAGACCATGGCAGATCTAACCGAAGACGAGTACAACGCCGGCCAAGATATCGTCGAGTTCGTCGGT : 336
s_etnD : TTGGTCGTCGACGTCGGCGAGACCATGGCAGATCTGACCGAAGACGAGTACAACGCCGGCCAAGATATCGTCGAGTTCGTCGGT : 336
n_etnD : ACGGTCGACCGCATCGTCGACTACACGGCGGATATCAAGGGCATCGAGATCGCCTTGACGAGCCCTCAGCGATATCGTTCGTA : 420
s_etnD : ACGGTCGACCGCATCGTCGACTACACGGCGGATATCAAGGGCATCGAGATCGCCTTGACGAGCCGTCAGCGATTTCGTTCGTA : 420
n_etnD : CCCGGCCCAGTATGTGCAAGTCCTTGTCCC GGGATCCGACGACGCATGGCGGTCGTTCTCGATGGCCAACCGACCGAGCGACAAC : 504
s_etnD : CCCGGCCCAGTATGTGCAAGTCCTTGTCCC GGGATCCGACGACGCATGGCGGTCGTTCTCGATGGCCAACCGCCCGAGCGACAAC : 504
n_etnD : TCGAGGTGCACCTTGTAGTTCGCGTGATCCCCGATGGGCGGTTACCTCGCAGATCGGTACGACCATCTCCGCGGGGACAAGG : 588
s_etnD : TCGCGTTGCACCTTGTAGTTCGCGTGATCCCCGATGGGCGGTTACCTCGCAGATCGGTACGACCATCTCCGCGGGGACACGT : 588
n_etnD : CTGAACTTGCGCGGCCCATTTGGGGCAGTTTGAATTCGACTATCACACCGGCCGATAATCTTCATCGCGGGAGGTTCCGGGTATT : 672
s_etnD : CTGAACTTGCGCGGCCCATTTGGGGCAGTTTGAATTCGTCTGTCACACCGGCCGATTATTCTTCATCGCGGGAGGTTCCGGGTATT : 672
n_etnD : GCCCCGGTACTTTTCGATGCTCGCTGACCTTATCGAGCAGAATAATCAACGGCGAACGACGTTTCTCTACGGCGCGCGCACCGTG : 756
s_etnD : GCCCCGGTACTTTTCGATGCTCGCTGACCTTATCGAGCAGAATAATCAACGGCGTACGACGTTTCTCTACGGCGCGCGCACCGTG : 756
n_etnD : GCTGACCTCCAATGCTGGACGAACTCGACAACTCTCAGATGAGCTGGACTGGTTCACTTTTATCCCTGCGCTGAGTCAGCCT : 840
s_etnD : GCTGACCTCCAATGCTGGACGAACTCGTCAACTCTCAGATGAGCTGGACTGGTTCACTTTTATCCCTGCGCTGAGTCAGCCT : 840
n_etnD : GACGATACCCCGTGGGACGGCGAAACCGGTTTGATCACCAGGTTTACCACCGAAACTTCCCGAGTGCCACGGACATGAGGCG : 924
s_etnD : GACGATACCCCGTGGGACGGCGAAACCGGTTTGATCACCAGGTTTACCACCGTAACTTCCCGAGTGCCACGGACATGAGGCG : 924
n_etnD : TACTTGTGTGGCCCCGCCTGGAATGATCGATGCAGCACTGGAGTCGCTGATCGCTAGCGGCTGTAAGGAGCGCCATATTTTCTTT : 1008
s_etnD : TATTTGTGTGGCCCCGCCTGGAATGATCGATGCAGCACTGGAGTCGCTGATCGCTAGCGGCTGTAAGGAGCGCCATATTTTCTTT : 1008
n_etnD : GACAGGTTCGTTCCGTCTGGATAG : 1032
s_etnD : GACCGTTTCGTTCCGTCTGGATAA : 1032

```

**Supplemental Figure 2.** Alignment of synthetic vs. native *etnHABCD* sequences. Native sequences are prefixed with a "n", synthetic sequences are prefixed with a "s". Rare codons are coloured in red (Arg), orange (Pro), green (Leu), or blue (Ile). The RBS's of all five genes were changed to AAGGAGG, with a spacing of six bases between the RBS and start codon.

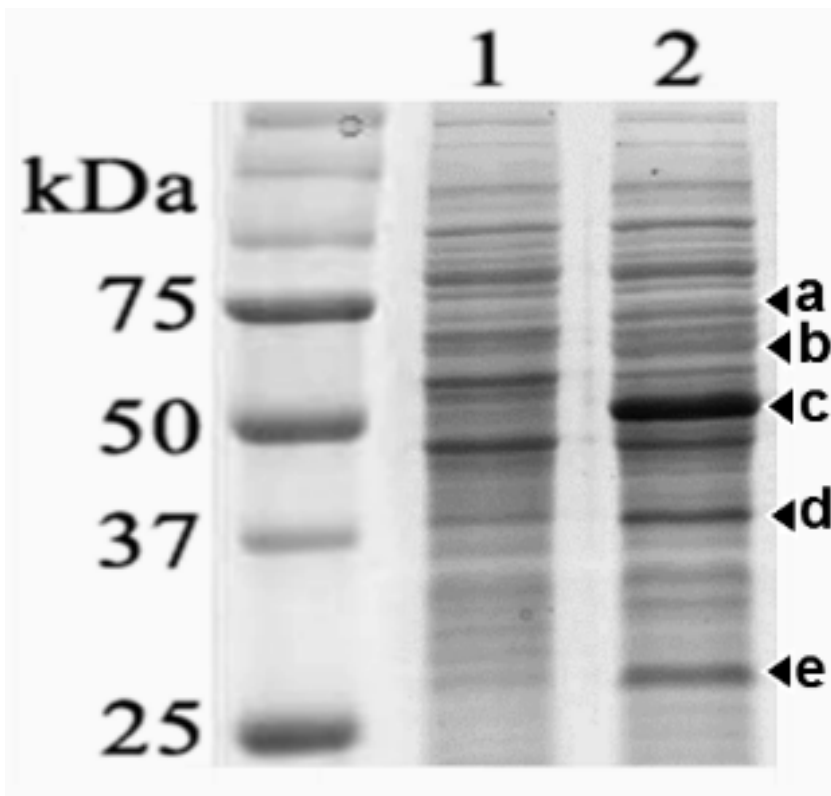

**Supplemental Figure 3.** Evidence of ethene MO expression in SDS-PAGE of *M. smegmatis* mc<sup>2</sup>-155 cell extracts. **Lane 1**, mc<sup>2</sup>-155(pUS116); **Lane 2**, mc<sup>2</sup>-155(pUS116-ETN). Both samples are from acetamide-induced cultures. Induced proteins unique to the mc<sup>2</sup>-155(pUS116-ETN) culture are labelled (a) to (e). the mc<sup>2</sup>-155(pUS116-ETN) culture are indicated by letters (a) to (e). Protein bands (c) and (d) correspond to the sizes of EtnC and EtnD, respectively.

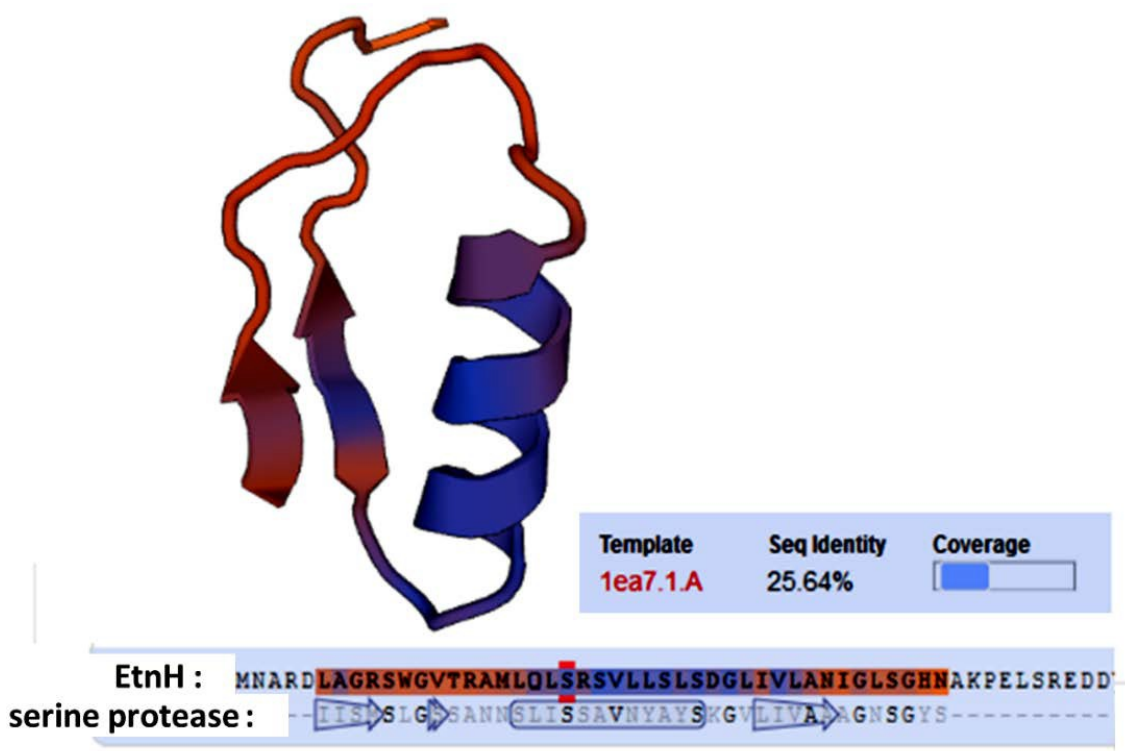

**Supplemental Figure 4.** Structure modelling of EtnH of strain NBB4 using SWISSMODEL.

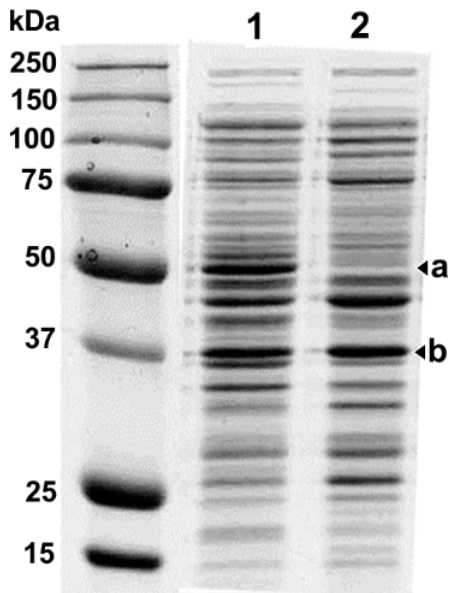

**Supplemental Figure 5.** SDS-PAGE comparison of soluble and total cell fractions of *E. coli* BL21 cells expressing *etnHABCD* genes. **Lane 1**, total cell lysate; **Lane 2**, soluble fraction. Label (a) shows the expected location of EtnC, and label (b) shows the expected location of EtnA. Note the presence of the putative EtnC band only in the total cell lysate, not the soluble fraction.

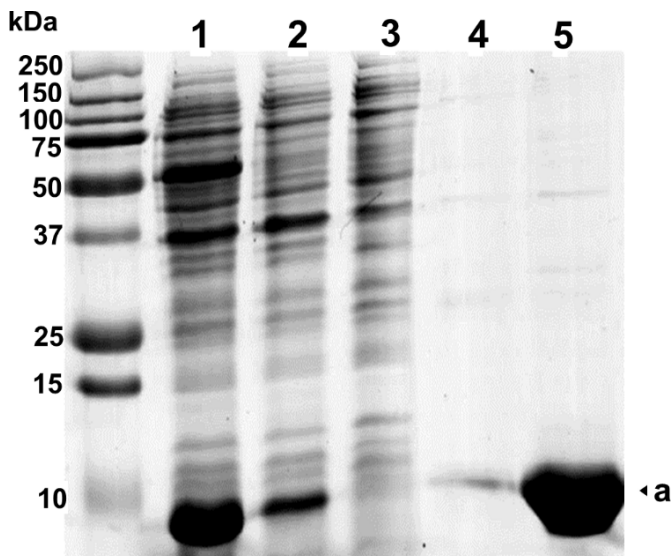

**Supplemental Figure 6.** Purification of His-tagged EtnB from BL21(DE3) cells.

Lane 1, Soluble fraction of whole cell lysate; Lane 2, nickel column wash step #1; Lane 3, nickel column wash step #2; Lane 4, nickel column elution step #1; Lane 5, nickel column elution step #2. The band labelled (a) corresponds to the predicted size of the 6xHis-tagged EtnB protein.
